# Supplementary material
Source: PubMed Central journal article supplement (PMC5720914)
Supplement: NIHMS910781-supplement-1.pdf [file NIHMS910781-supplement-1.pdf]

## **Asprosin is a centrally-acting orexigenic hormone**

**Supplemental figures**

**Supplemental figure legends**

**Supplemental tables**

# Supplemental Fig. 1

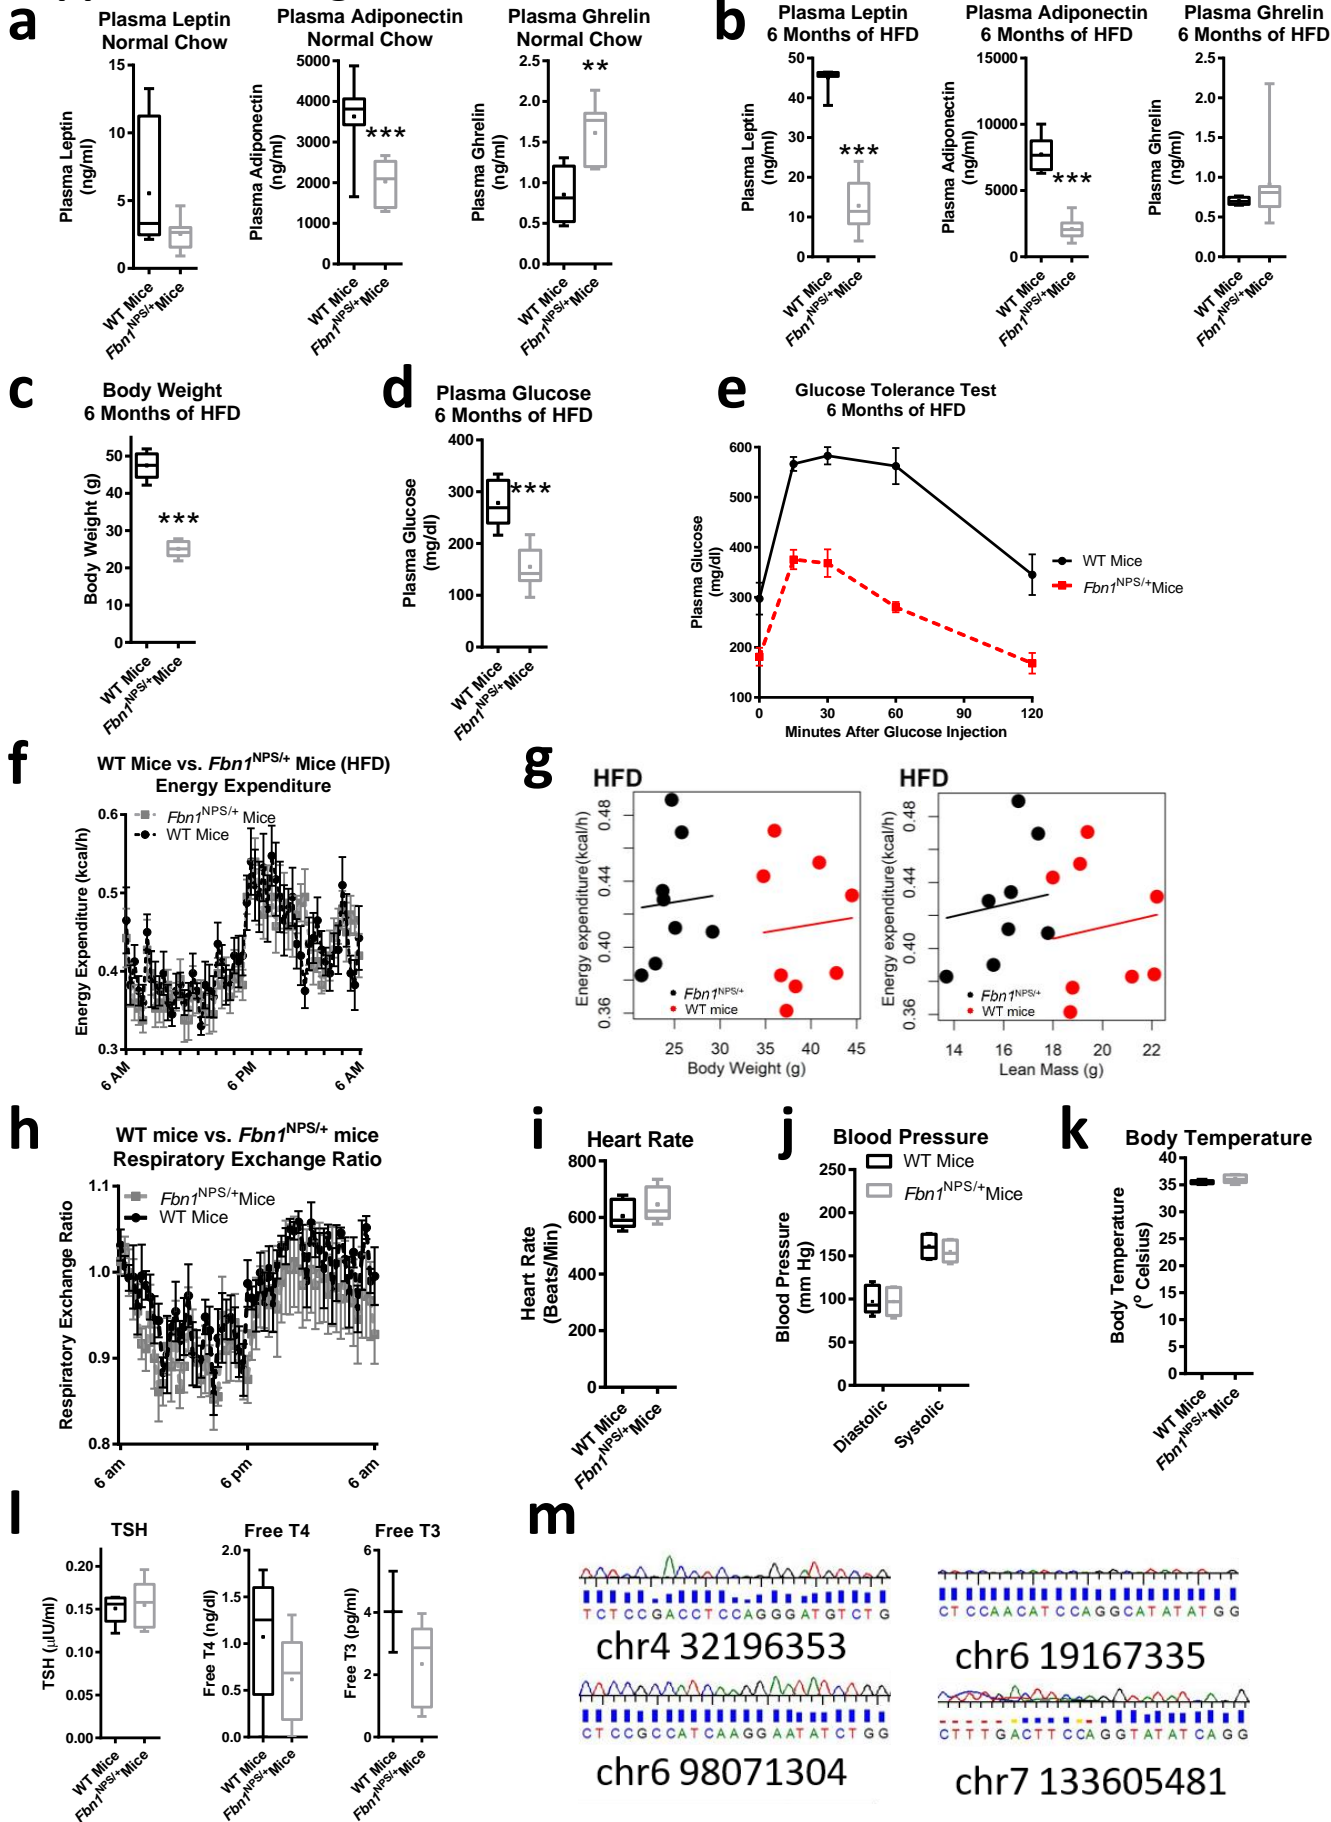

# Supplemental Fig. 2

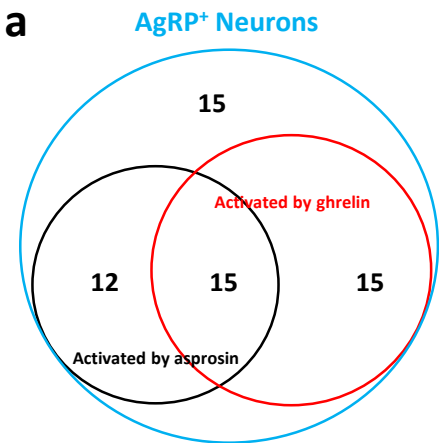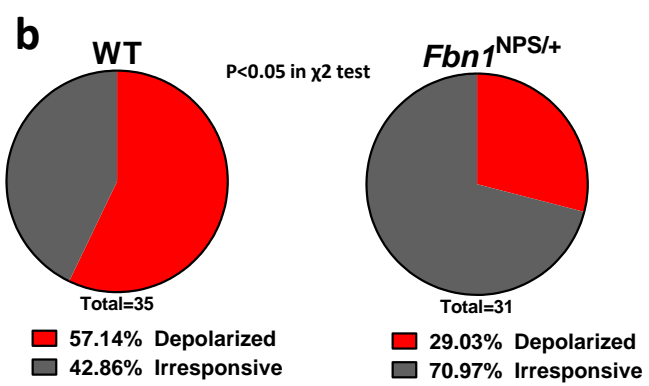

# Supplemental Fig. 3

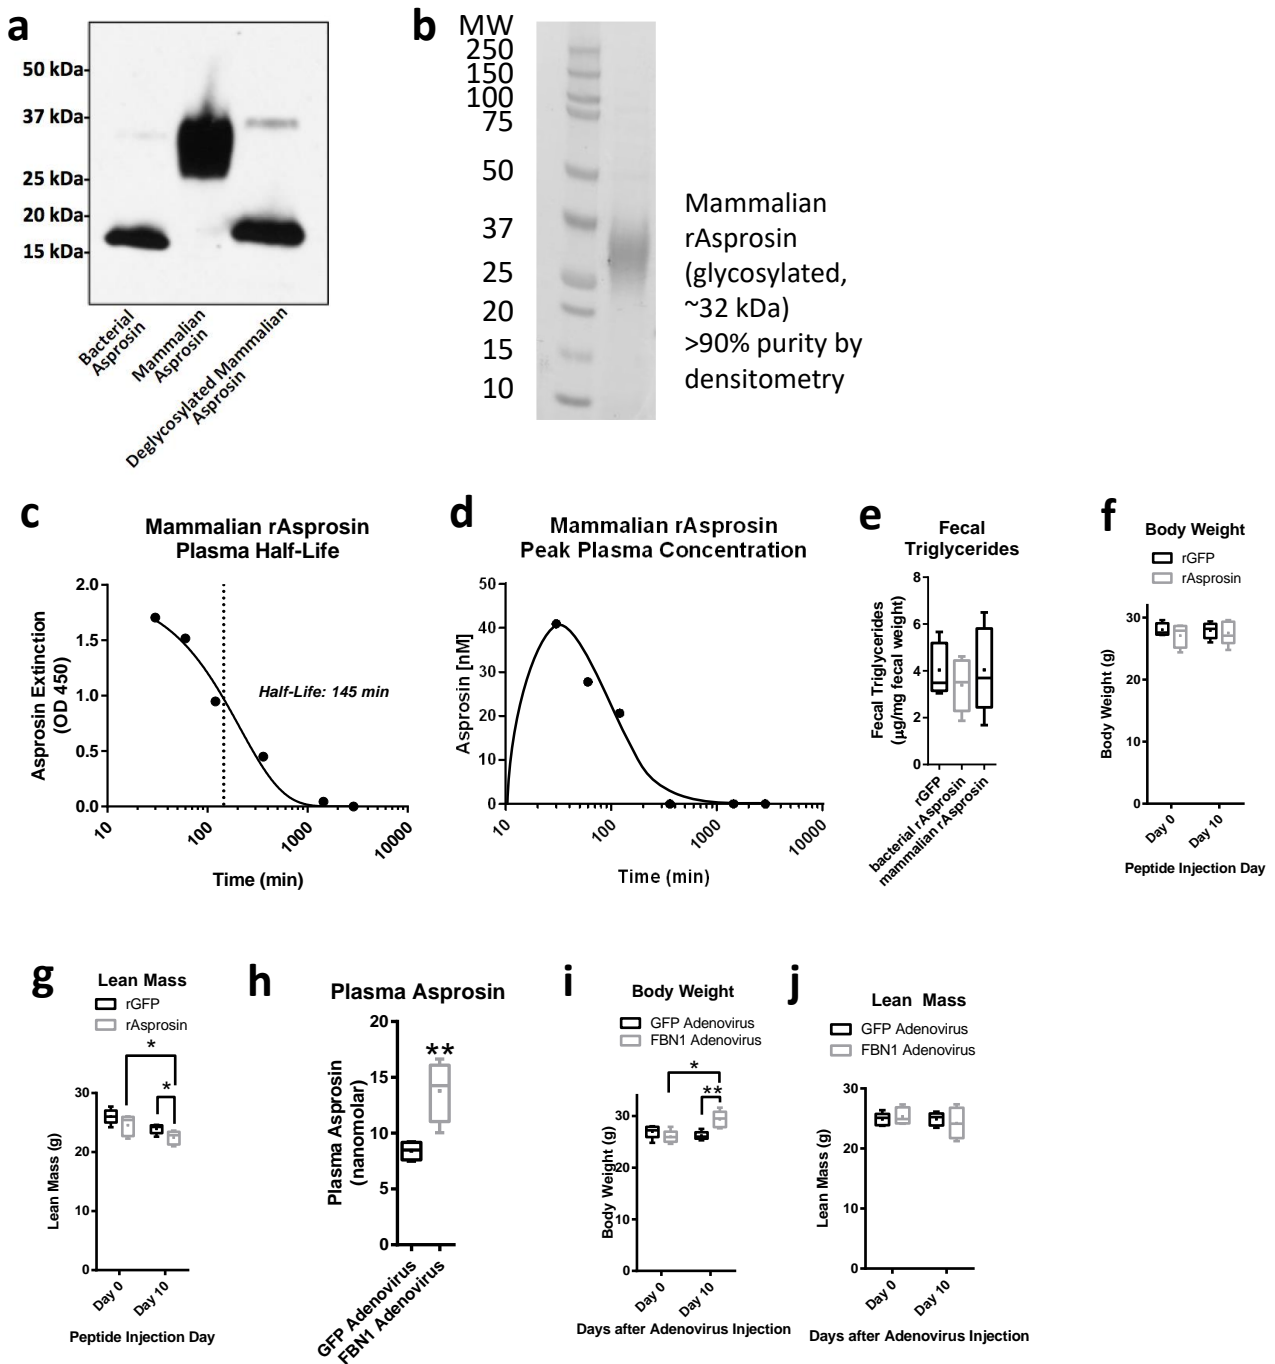

# Supplemental Fig. 4

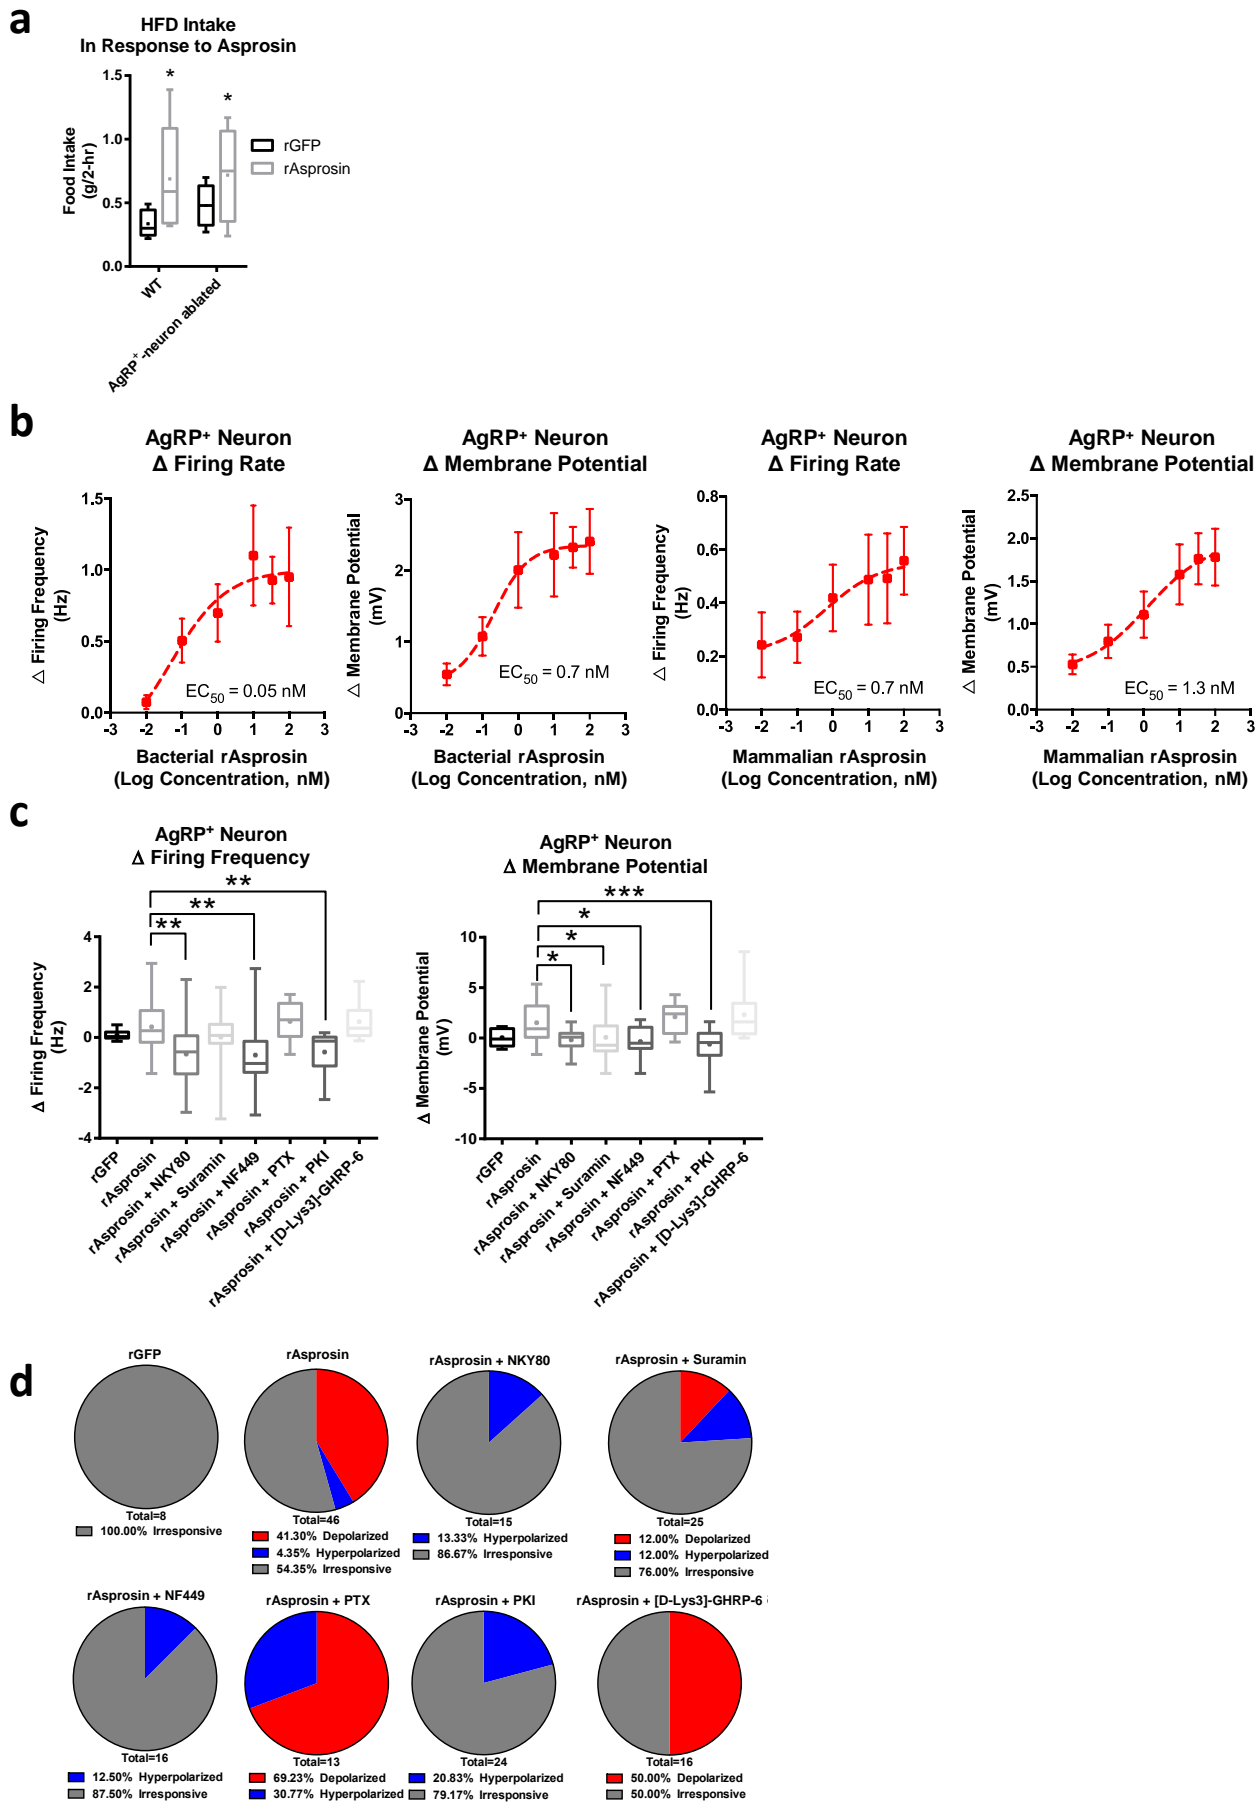

# Supplemental Fig. 5

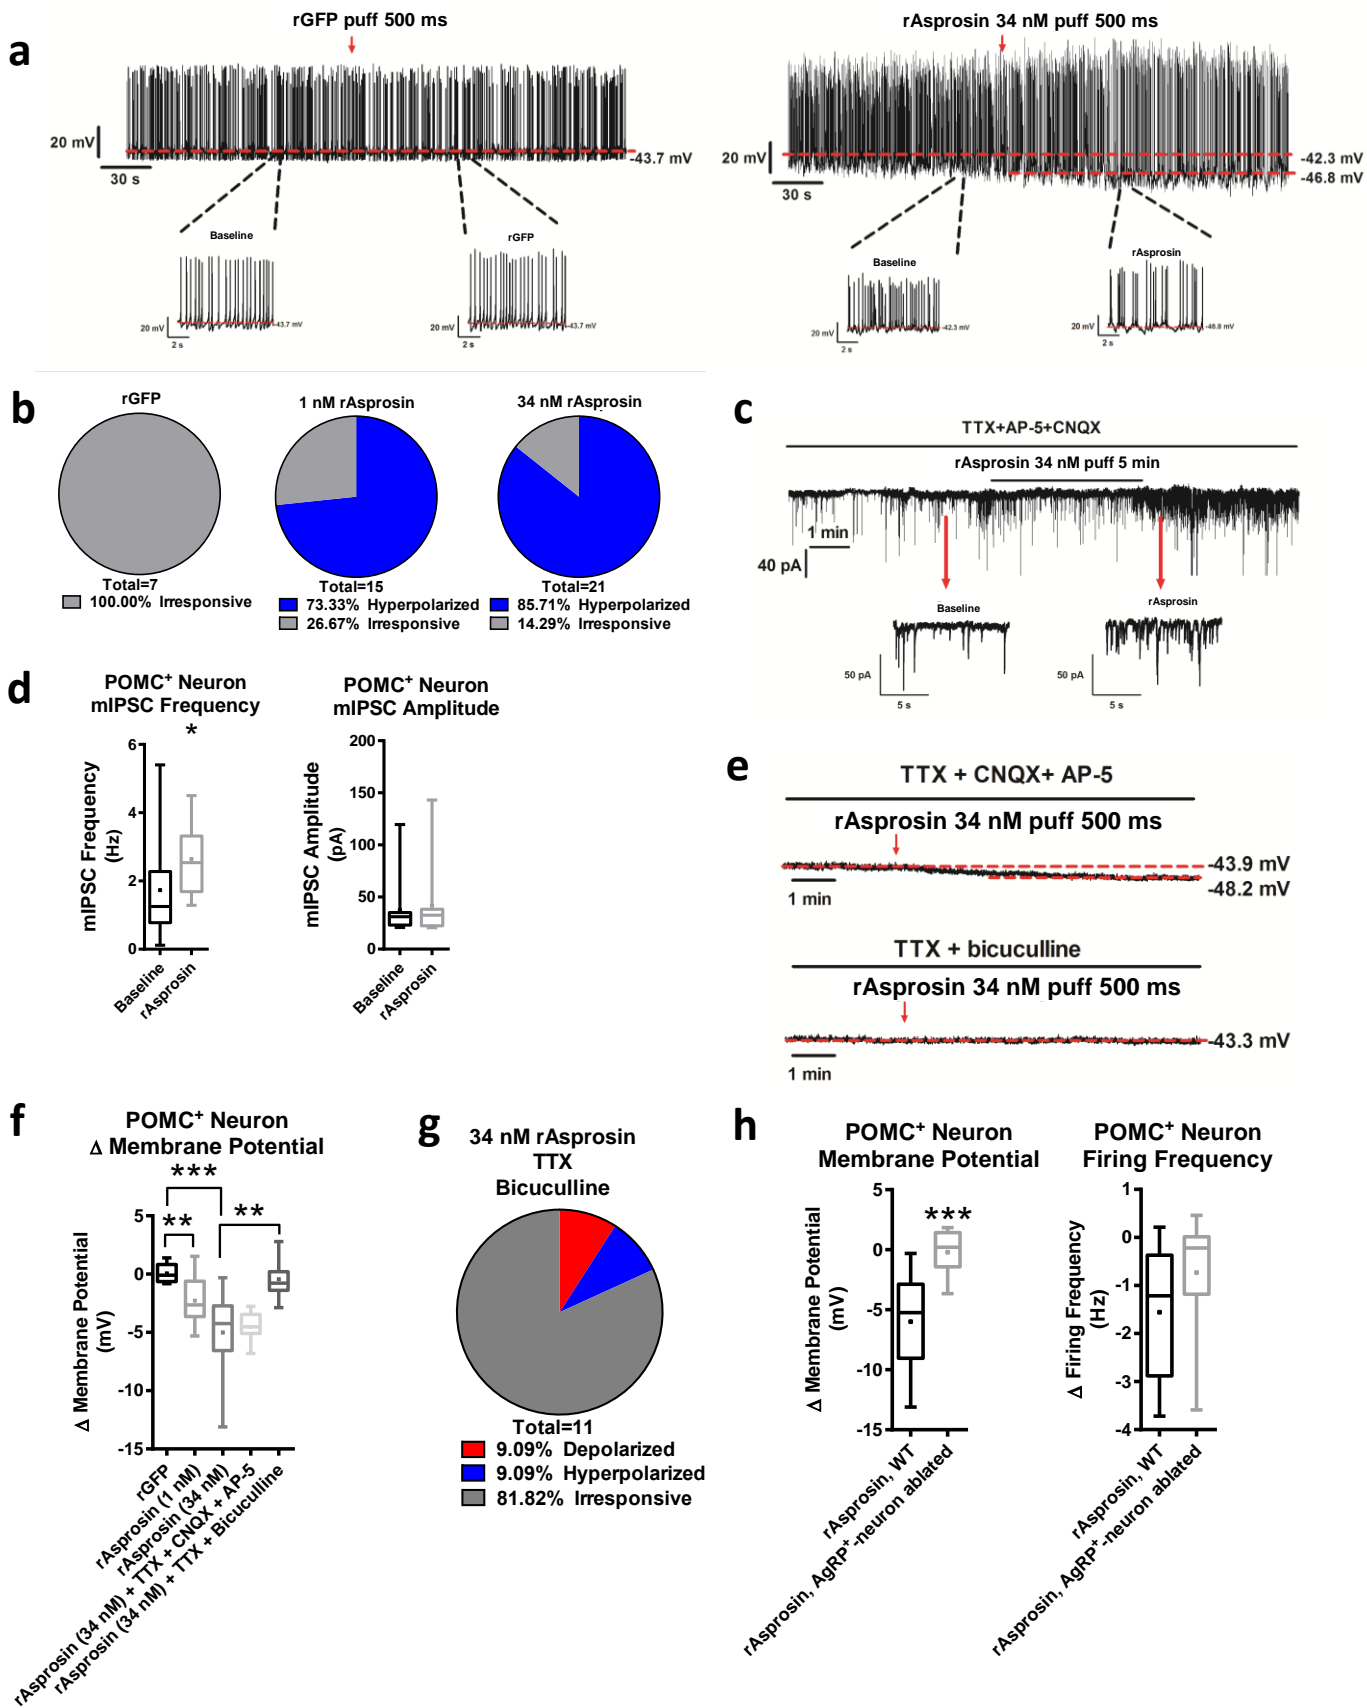

# Supplemental Fig. 6

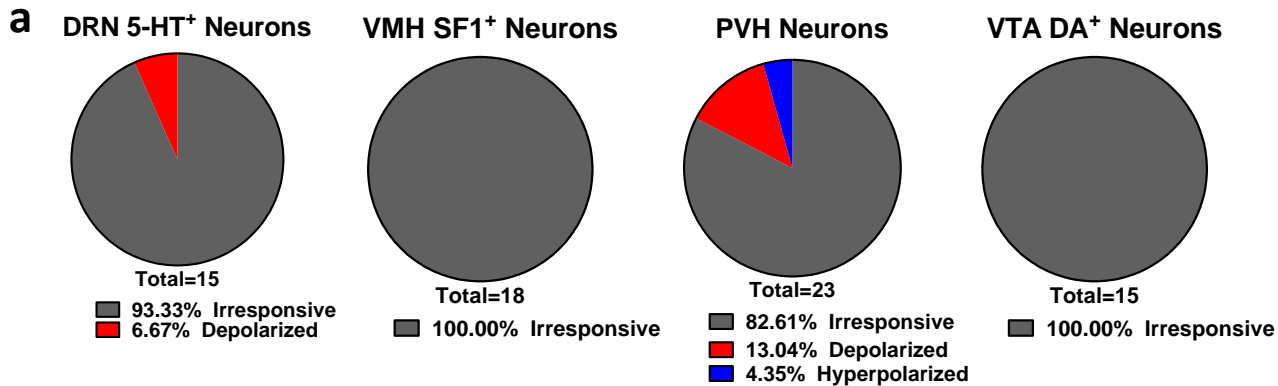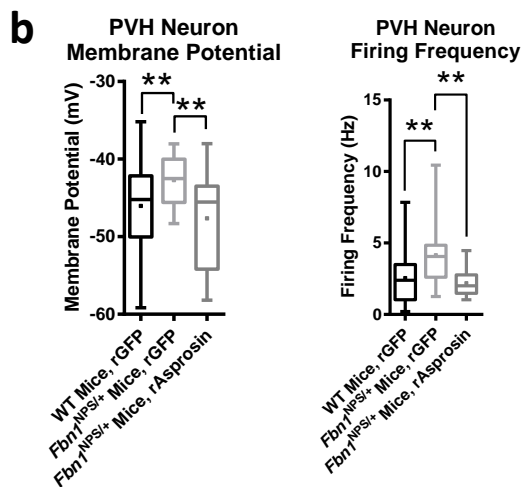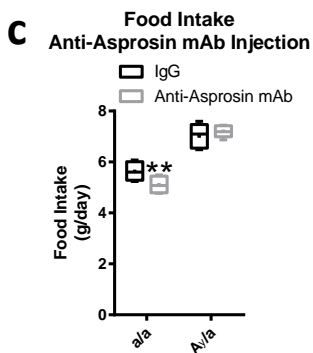

# Supplemental Fig. 7

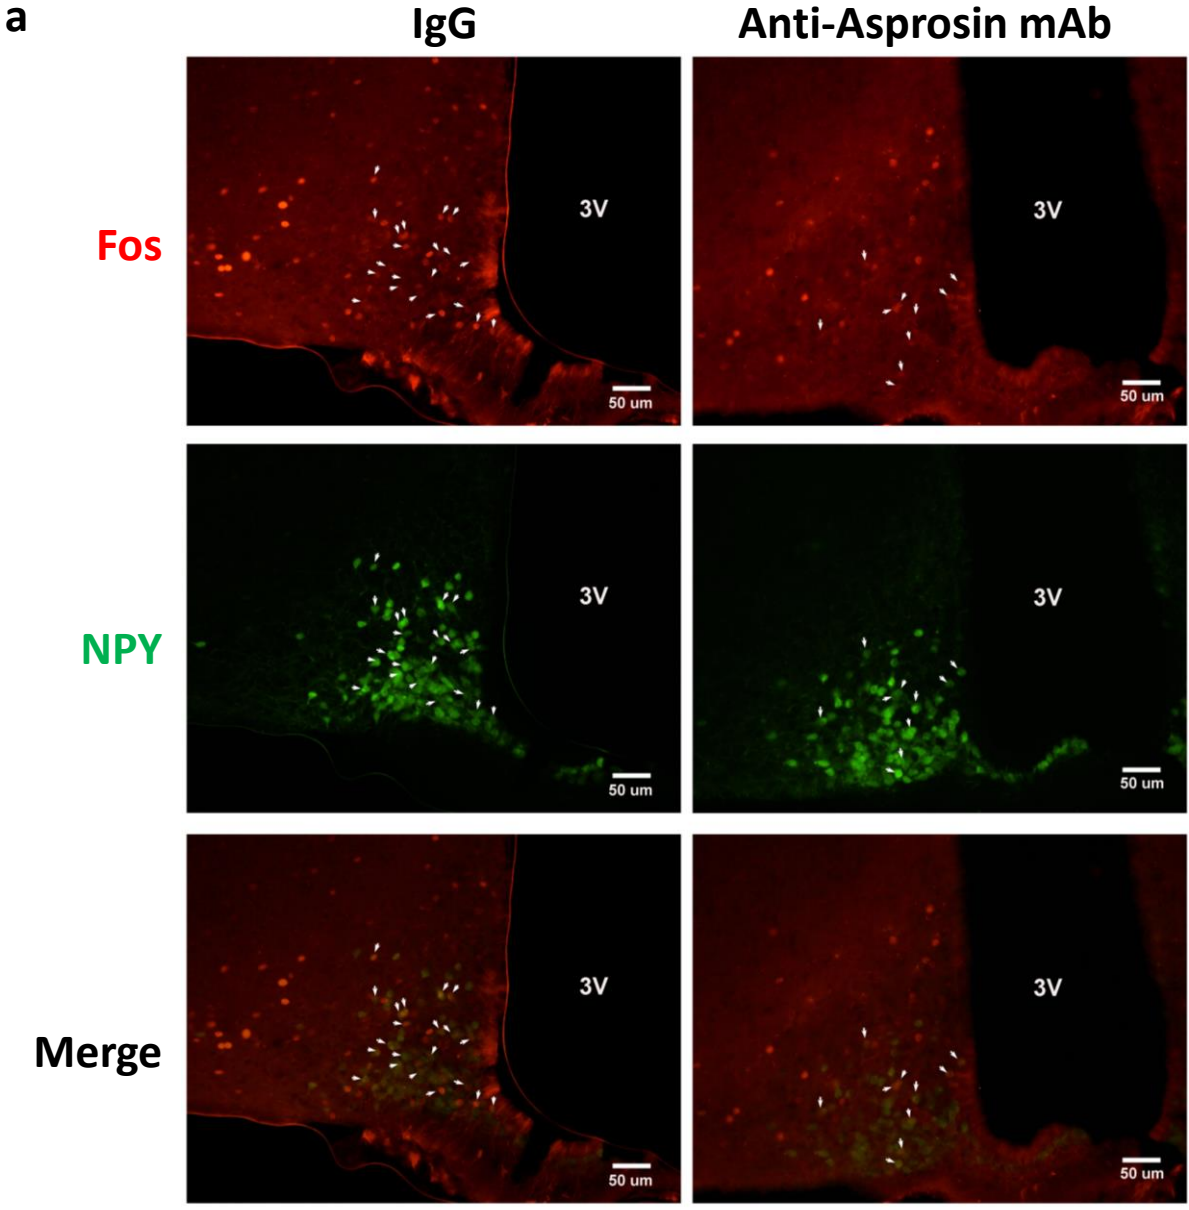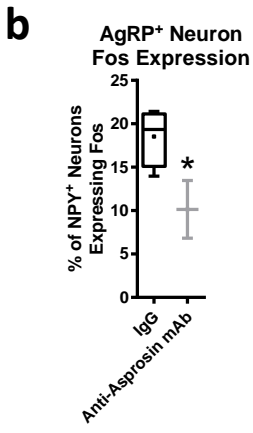



# Supplemental Fig. 8

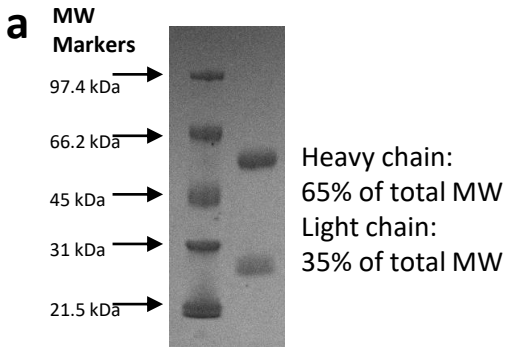

**b**

|                                                                                         |          |
|-----------------------------------------------------------------------------------------|----------|
| STNET[...] <u>TYSLQISSTPLY</u> <u>KKKELNQLEDKYDKDYL</u> <u>SGELGDNLMK</u> IQVLLH – COOH |          |
| <u>KKKELNQ</u>                                                                          | 255.6    |
| <u>KELNQLED</u>                                                                         | 922.5    |
| <u>LNQLEDKY</u>                                                                         | 63.4     |
| <u>QLEDKYDK</u>                                                                         | 95.2     |
| <u>EDKYDKDY</u>                                                                         | 4.5      |
| <u>KYDKDYL</u>                                                                          | 44.2     |
| <u>DKDYL</u> <u>SGE</u>                                                                 | 929.6    |
| <u>DYLSGELG</u>                                                                         | 14,094.4 |
| <u>LSGELGDN</u>                                                                         | 111.9    |
| <u>GELGDNLMK</u>                                                                        | 39.4     |
| <u>LGDNLKMK</u>                                                                         | 74.2     |

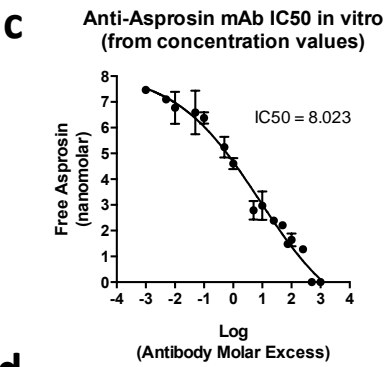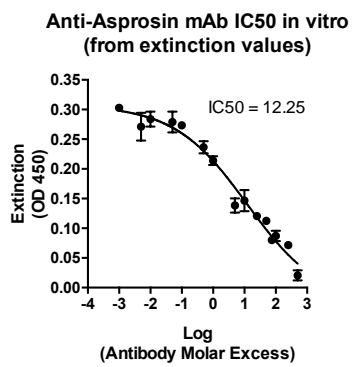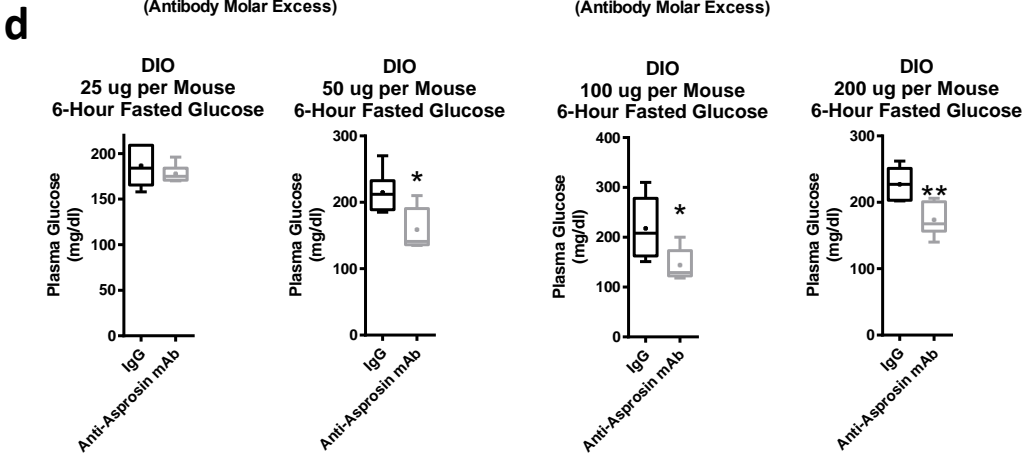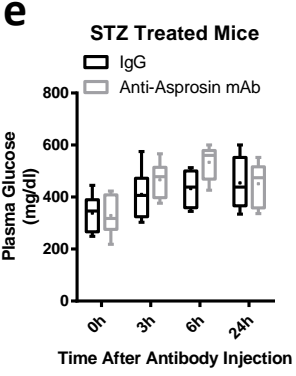

# Supplemental Fig. 9

**a**

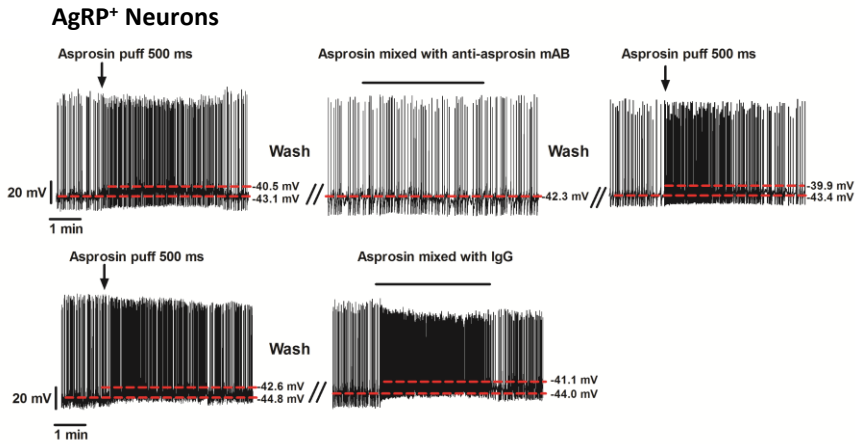

**b**

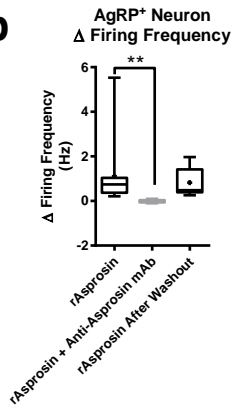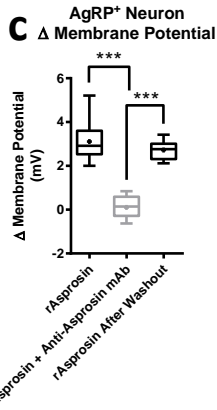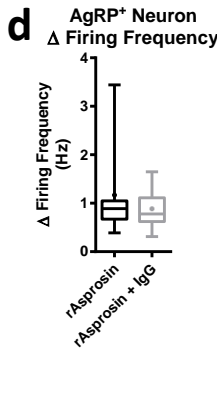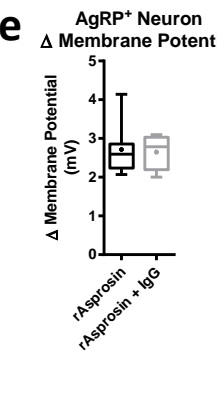

**f**

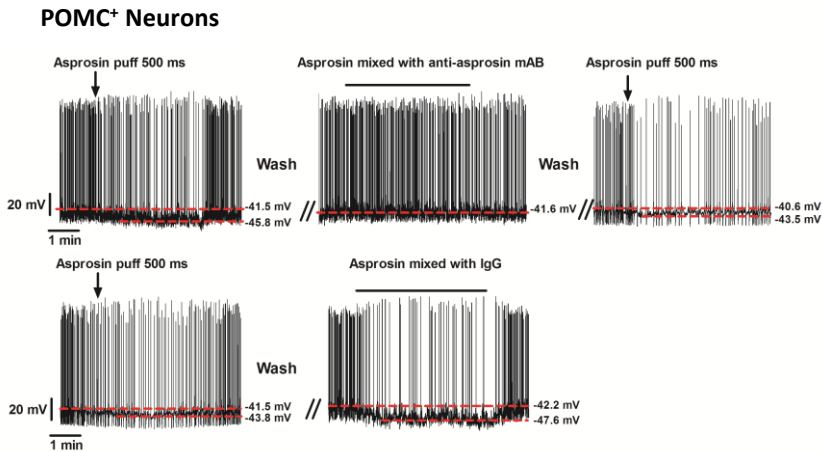

**g**

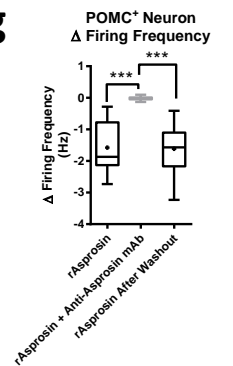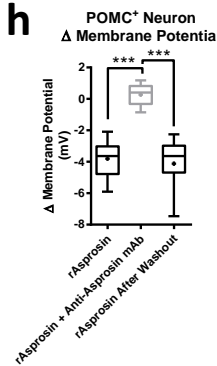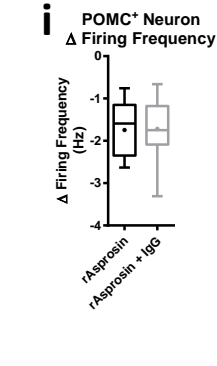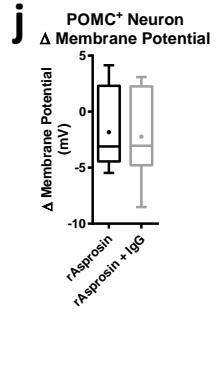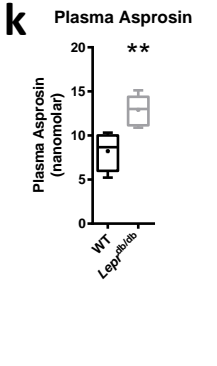

## Supplemental figure legends

**Supplemental Fig. 1** *Fbn1*<sup>NPS/+</sup> mice mimic human NPS and are protected from diet-induced obesity and diabetes (a) Plasma ELISA for leptin, adiponectin, and ghrelin in WT and *Fbn1*<sup>NPS/+</sup> mice on normal chow ( $n = 6$ ,  $P = 0.06$ ). (b) Plasma ELISA for leptin, adiponectin, and ghrelin in WT and *Fbn1*<sup>NPS/+</sup> mice after 6 months on high-fat diet ( $n = 6$ ). (c) Body weight of WT and *Fbn1*<sup>NPS/+</sup> mice after 6 months on high-fat diet ( $n = 6$ ). (d) Plasma glucose in WT and *Fbn1*<sup>NPS/+</sup> mice after 6 months on high-fat diet ( $n = 6$ ). (e) Glucose tolerance test in WT and *Fbn1*<sup>NPS/+</sup> mice after 6 months of high-fat diet ( $n = 6$ ,  $P = 0.0001$ ). (f) Energy expenditure over 24 hr in WT and *Fbn1*<sup>NPS/+</sup> mice on HFD for 3 months ( $P = 0.74$ ). (g) Analysis of energy expenditure of *Fbn1*<sup>NPS/+</sup> mice and WT littermates on HFD for 3 months by ANCOVA ( $n = 5$  per group, body weight  $P = 0.633$  and lean mass  $P = 0.437$ ). (h) Respiratory Exchange Ratio over 24 hr in WT and *Fbn1*<sup>NPS/+</sup> mice ( $n = 5$  per group,  $P = 0.39$ ). (i) Heart rate, blood pressure (j) and body temperature (k) of WT and *Fbn1*<sup>NPS/+</sup> mice ( $n = 5$  for NPS,  $n = 7$  for WT). (l) Plasma ELISA for TSH, free T4, and free T3 in WT and *Fbn1*<sup>NPS/+</sup> mice ( $n = 5$  per group). (m) Representative sequence traces of *Fbn1*<sup>NPS/+</sup> mice.  $**P < 0.01$ , and  $***P < 0.001$ . Statistical tests used: two-tailed  $t$ -test (a-d,i-m) and two-way ANOVA (e,f,h).

**Supplemental Fig. 2** Response of feeding-related neuron populations to asprosin (a) VENN-diagram of a set of AgRP<sup>+</sup> neurons tested and response to asprosin and ghrelin (rAsprosin: 34 nM; Ghrelin: 300 nM). (b) Ghrelin-mediated activation of AgRP<sup>+</sup> neurons from *Fbn1*<sup>NPS/+</sup> mice and WT mice (rAsprosin: 34 nM; Ghrelin: 300 nM,  $p < 0.05$  in  $\chi^2$  test).

**Supplemental Fig. 3** Mammalian asprosin is glycosylated and has a plasma half-life of approximately 145 minutes. **(a)** Immunoblot for mammalian-expressed rAsprosin (lane 2). The same sample was enzymatically deglycosylated and loaded in lane 3. Bacterially expressed rAsprosin control in lane 1. **(b)** Coomassie Blue stained SDS PAGE gel of mammalian rAsprosin (glycosylated, ~32 kDa). **(c)** Plasma half-life of mammalian rAsprosin as determined by ELISA after subcutaneous injection of 60  $\mu$ g mammalian rAsprosin. **(d)** Peak plasma asprosin concentration as determined by ELISA after subcutaneous injection of 60  $\mu$ g of mammalian rAsprosin. **(e)** Fecal triglyceride content in mice during 24 hr following injection with GFP, bacterial recombinant asprosin, or mammalian recombinant asprosin (60  $\mu$ g/mouse rGFP, 30  $\mu$ g/mouse bacterial rAsprosin, and 60  $\mu$ g/mouse mammalian rAsprosin,  $n = 5$  per group). **(f)** Body weight of WT mice before and after 10 days of daily subcutaneous injection with 30  $\mu$ g rGFP or bacterial rAsprosin ( $n = 5$ ). **(g)** Lean mass of WT mice before and after 10 days of daily subcutaneous injection with 30  $\mu$ g rGFP or bacterial rAsprosin, as determined by MRI ( $n = 5$ ). **(h)** Plasma ELISA for Asprosin in mice with adenovirus-mediated overexpression of GFP or *FBNI* in the liver ( $n = 5$ ). **(i)** Body weight of WT mice before and 10 days after injection of a GFP or *FBNI* adenovirus ( $n = 5$ ). **(j)** Lean mass of WT mice before and 10 days after injection of a GFP or *FBNI* adenovirus, as determined by MRI ( $n = 5$ ). \* $P < 0.05$ , and \*\* $P < 0.01$ . Statistical tests used: two-tailed  $t$ -test **(h)**, one-way ANOVA **(e)**, and two-way ANOVA **(f,g,i,j)**.

**Supplemental Fig. 4** Asprosin employs the  $G_{\alpha_s}$ -cAMP-PKA pathway to activate  $AgRP^+$  neurons in a dose-responsive manner **(a)** Cumulative food intake on HFD during 2 hr after IP injection of GFP or bacterial recombinant asprosin in WT control or  $AgRP^+$  ablated mice (30  $\mu$ g/mouse,  $n = 6$  per group,  $P = 0.02$ ). **(b)**  $AgRP^+$  neuron firing frequency and membrane potential changes in response to increasing concentrations of recombinant asprosin produced bacterially or in mammalian cells (Firing frequency: bacterial rAsprosin 0.01 nM  $n = 9$ , 0.1 nM  $n = 11$ , 1 nM  $n = 8$ , 10 nM  $n = 12$ , 34 nM  $n = 24$ , 100 nM  $n = 14$ ; mammalian rAsprosin: 0.01 nM  $n = 12$ , 0.1 nM  $n = 15$ , 1 nM  $n = 15$ , 10 nM  $n = 14$ , 34 nM  $n = 15$ , 100 nM  $n = 15$ . Membrane potential: bacterial rAsprosin 0.01 nM  $n = 13$ , 0.1 nM  $n = 11$ , 1 nM  $n = 13$ , 10 nM  $n = 10$ , 34 nM  $n = 33$ , 100 nM  $n = 15$ ; mammalian rAsprosin: 0.01 nM  $n = 13$ , 0.1 nM  $n = 16$ , 1 nM  $n = 15$ , 10 nM  $n = 15$ , 34 nM  $n = 16$ , 100 nM  $n = 15$ ). **(c)** Changes of AP firing frequency and membrane potential in  $AgRP^+$  neurons after treatment with rGFP, bacterial rAsprosin, and in the presence of different inhibitors (Firing frequency: rGFP  $n = 8$ , rAsprosin  $n = 39$ , rAsprosin + 100  $\mu$ M NKY80  $n = 15$ , rAsprosin + 50  $\mu$ M suramin  $n = 16$ , rAsprosin + 20  $\mu$ M NF449  $n = 16$ , rAsprosin + 50  $\mu$ M PTX  $n = 12$ , rAsprosin + 1  $\mu$ M PKI  $n = 23$ , rAsprosin + 100  $\mu$ M [D-Lys3]-GHRP-6  $n = 13$ . Membrane potential: rGFP  $n = 8$ , rAsprosin  $n = 44$ , rAsprosin + 100 $\mu$ M NKY80  $n = 15$ , rAsprosin + 50  $\mu$ M suramin  $n = 25$ , rAsprosin + 20  $\mu$ M NF449  $n = 16$ , rAsprosin + 50  $\mu$ M PTX  $n = 13$ , rAsprosin + 1  $\mu$ M PKI  $n = 24$ , rAsprosin + 100  $\mu$ M [D-Lys3]-GHRP-6  $n = 16$ ). **(d)** Response ratio of  $AgRP^+$  neurons after treatment with rGFP, bacterial rAsprosin, and in the presence of different inhibitors (rGFP  $n = 8$ , rAsprosin  $n = 46$ , rAsprosin + 100 $\mu$ M NKY80  $n = 15$ , rAsprosin + 50  $\mu$ M suramin  $n = 25$ , rAsprosin + 20  $\mu$ M NF449  $n = 16$ , rAsprosin + 50

$\mu\text{M}$  PTX  $n = 13$ , rAsprosin + 1  $\mu\text{M}$  PKI  $n = 24$ , rAsprosin + 100  $\mu\text{M}$  [D-Lys3]-GHRP-6  $n = 16$ ). \* $P < 0.05$ , \*\* $P < 0.01$ , and \*\*\* $P < 0.001$ . Statistical tests used: one-way ANOVA (c), and two-way ANOVA (a).

**Supplemental Fig. 5** Asprosin inhibits anorexigenic POMC<sup>+</sup> neurons indirectly through a GABAergic mechanism (a) Representative AP firing traces of POMC<sup>+</sup> neurons after GFP and bacterial recombinant asprosin treatment. (b) Response ratio of POMC<sup>+</sup> neurons after GFP, 1nM and 34nM bacterial recombinant asprosin treatment (rGFP  $n = 7$ , 1 nM rAsprosin  $n = 15$ , 34 nM rAsprosin  $n = 21$ ). (c) Representative miniature inhibitory postsynaptic current (mIPSC) trace of POMC<sup>+</sup> neurons before and after bacterial recombinant asprosin treatment in the presence of inhibitors (AP-5: 30  $\mu\text{M}$ , CNQX: 30  $\mu\text{M}$  and TTX: 1  $\mu\text{M}$ ). (d) mIPSC frequency and amplitude in POMC<sup>+</sup> neurons before and after bacterial recombinant asprosin treatment ( $n = 10$  per group). (e) Representative AP firing traces of POMC<sup>+</sup> neurons before and after bacterial recombinant asprosin in the presence of various inhibitors. (f) Amplitude changes of POMC<sup>+</sup> membrane potential after GFP or bacterial recombinant asprosin treatment only, and in the presence of different inhibitors (AP-5: 30  $\mu\text{M}$ , CNQX: 30  $\mu\text{M}$  and TTX: 1  $\mu\text{M}$ ; TTX: 1  $\mu\text{M}$  and bicuculline: 50  $\mu\text{M}$ ; rGFP  $n = 7$ , 1 nM rAsprosin  $n = 15$ , 34 nM  $n = 21$ , 34 nM + TTX + CNQX + AP5  $n = 12$ , 34 nM + TTX + bicuculline  $n = 10$ ). (g) Response ratio of POMC<sup>+</sup> neurons after 34 nM bacterial recombinant asprosin treatment in the presence of TTX + bicuculline. (h) Amplitude changes of POMC<sup>+</sup> neuron membrane potential and firing frequency in WT and AgRP<sup>+</sup> neuron ablated mice after treatment with bacterial recombinant asprosin (rAsprosin: 34 nM; firing frequency: rAsprosin, WT  $n = 8$ ;

rAsprosin, AgRP<sup>+</sup>-ablated  $n = 17$ . Membrane potential: rAsprosin, WT  $n = 6$ ; rAsprosin, AgRP<sup>+</sup>-ablated  $n = 23$ ). \* $P < 0.05$ , \*\* $P < 0.01$ , and \*\*\* $P < 0.001$ . Statistical tests used: two-tailed  $t$ -test (**d,h**) and one-way ANOVA (**f**).

**Supplemental Fig. 6** Asprosin acts via AgRP<sup>+</sup> neurons and requires intact melanocortin signaling (a) Response rates of 5-HT<sup>+</sup> neurons in the dorsal raphe nuclei (DRN), SF1<sup>+</sup> neurons in the ventromedial hypothalamic nucleus (VMH), neurons in the paraventricular nucleus of the hypothalamus (PVH), and dopamine (DA<sup>+</sup>) neurons in the ventral tegmental area (VTA; rAsprosin: 34 nM). (b) Membrane potential and firing frequency of PVH neurons from *Fbn1*<sup>NPS/+</sup> mice after ICV injection with 0.5  $\mu$ g GFP or Asprosin. WT mice with GFP injection served as controls (rAsprosin: 0.5  $\mu$ g; rGFP: 0.5  $\mu$ g). (c) Cumulative food intake during 24 hr after IP injection of 250  $\mu$ g IgG or anti-asprosin mAb in WT control (a/a) or Agouti yellow (A<sup>y</sup>/a) mice (KK background,  $n = 5$  per group). \*\* $P < 0.01$ . Statistical tests used: one-way ANOVA (**b**), and two-way ANOVA (**c**).

**Supplemental Fig. 7** Asprosin immunologic neutralization reduces Fos expression in AgRP<sup>+</sup> neurons (a) Immunofluorescence for Fos (top), NPY-GFP (center), and a merged composite (bottom) in the arcuate nucleus of mice receiving either IgG control, or anti-asprosin antibody followed by an overnight fast (100  $\mu$ g/250  $\mu$ l/mouse; scale bar indicates 50  $\mu$ m). (b) Count of double positive neurons from **a** (IgG  $n = 4$  total images, anti-asprosin mAb  $n = 2$  total images). \* $P < 0.05$ . Statistical tests used: two-tailed  $t$ -test (**b**).

**Supplemental Fig. 8** Characterization of the anti-asprosin neutralizing antibody (a) SDS Page gel of the anti-asprosin mAb showing heavy chain (top band) and light chain (bottom band). Percentage of contribution to total molecular weight by heavy chain and light chain, respectively, was calculated by densitometry. (b) Epitope mapping for the asprosin epitope detected by the anti-asprosin mAb. The binding epitope is highlighted in red. (c) Elisa against recombinant asprosin pre-incubated with various concentrations of anti-asprosin mAb. 50% inhibitory concentration (IC<sub>50</sub>) based on concentration values was 8.023 nM, based on absolute extinction values 12.25 nM. (d) Plasma glucose in mice with diet-induced obesity after a single injection of various concentrations of anti-asprosin mAb ( $n = 6$  per group). (e) Plasma glucose in mice with chemical ablation of pancreatic  $\beta$ -cells by (Streptozotocin – STZ – treatment) in response to IgG or anti-asprosin mAb ( $n = 6$ ). \* $P < 0.05$ , and \*\* $P < 0.01$ . Statistical tests used: two-tailed  $t$ -test (d), and two-way ANOVA (e).

**Supplemental Fig. 9** The anti-asprosin neutralizing antibody reversibly inhibits asprosin's effect on AgRP<sup>+</sup> and POMC<sup>+</sup> neurons (a) Representative traces of AgRP<sup>+</sup> neurons in response to a bacterial recombinant asprosin puff, followed by asprosin preincubated with 100-fold excess anti-asprosin mAb, followed by asprosin, or the same preincubated with IgG control antibody (rAsprosin: 34 nM). (b) Firing frequency response of AgRP<sup>+</sup> neurons to bacterial recombinant asprosin, asprosin preincubated with anti-asprosin mAb, and response to asprosin after washout (rAsprosin  $n = 14$ , rAsprosin + mAb  $n = 14$ , washout  $n = 8$ ; rAsprosin: 34 nM). (c) Membrane potential response of



AgRP<sup>+</sup> neurons to bacterial recombinant asprosin, asprosin preincubated with anti asprosin mAb, and response to asprosin after washout (rAsprosin  $n = 14$ , rAsprosin + mAb  $n = 14$ , washout  $n = 8$ ; rAsprosin: 34 nM). **(d)** Firing frequency response of AgRP<sup>+</sup> neurons to bacterial recombinant asprosin and IgG control antibody (rAsprosin  $n = 7$ , rAsprosin + IgG  $n = 7$ ; rAsprosin: 34 nM). **(e)** Membrane potential response of AgRP<sup>+</sup> neurons to bacterial recombinant asprosin and IgG control antibody (rAsprosin  $n = 7$ , rAsprosin + IgG  $n = 7$ ; rAsprosin: 34 nM). **(f)** Representative traces of POMC<sup>+</sup> neurons in response to a bacterial recombinant asprosin puff, followed by asprosin preincubated with 100-fold excess anti-asprosin mAb, followed by asprosin, or the same preincubated with IgG control antibody (rAsprosin: 34 nM). **(g)** Firing frequency response of POMC<sup>+</sup> neurons to bacterial recombinant asprosin, asprosin preincubated with anti-asprosin mAb, and response to asprosin after washout (rAsprosin  $n = 24$ , rAsprosin + mAb  $n = 24$ , washout  $n = 24$ ; rAsprosin: 34 nM). **(h)** Membrane potential response of POMC<sup>+</sup> neurons to bacterial recombinant asprosin, asprosin preincubated with anti-asprosin mAb, and response to asprosin after washout (rAsprosin  $n = 20$ , rAsprosin + mAb  $n = 20$ , washout  $n = 20$ ; rAsprosin: 34 nM). **(i)** Firing frequency response of POMC<sup>+</sup> neurons to bacterial recombinant asprosin and IgG control antibody (rAsprosin  $n = 15$ , rAsprosin + IgG  $n = 15$ ; rAsprosin: 34 nM; IgG: 500  $\mu$ g/mL). **(j)** Membrane potential response of POMC<sup>+</sup> neurons to bacterial recombinant asprosin and IgG control antibody (rAsprosin  $n = 31$ , rAsprosin + IgG  $n = 31$ ; rAsprosin: 34 nM; IgG: 500  $\mu$ g/mL). **(k)** Elisa for plasma asprosin in 8-week-old male WT and *Lep<sup>r</sup><sup>db/db</sup>* mice (WT  $n = 5$ ; *Lep<sup>r</sup><sup>db/db</sup>*  $n = 6$ ). \*\* $P < 0.01$ , and \*\*\* $P < 0.001$ . Statistical tests used: two-tailed  $t$ -test (**d,e,i-k**), and one-way ANOVA (**b,c,g,h**).

## Supplemental tables

### Supplemental Table 1

#### a Anthropometric measurements

|                        | Body Weight       | Height             | BMI                     | Age          |
|------------------------|-------------------|--------------------|-------------------------|--------------|
| <i>Unit</i>            | <i>kg</i>         | <i>cm</i>          | <i>kg/m<sup>2</sup></i> | <i>years</i> |
| NPS1                   | 24.8              | 158.4              | 9.9                     | 25           |
| NPS2                   | 41                | 177.6              | 13                      | 18.7         |
| <i>reference value</i> | <i>73.4±0.85*</i> | <i>162.9±0.30*</i> | <i>18.5-24.9†</i>       |              |

#### b Body composition

| <i>Unit</i> | Total Body Potassium (TBK) |           |           |          | Dual-energy X-ray absorptiometry (DXA) |           |           |          | Air displacement plethysmography (BodPod) |                  | Lohman-4C |           |          |
|-------------|----------------------------|-----------|-----------|----------|----------------------------------------|-----------|-----------|----------|-------------------------------------------|------------------|-----------|-----------|----------|
|             | TBK                        | FFM       | FM        | %FM      | BMC                                    | FFM       | FM        | %FM      | Body Volume                               | O18 dilution TBW | FFM       | FM        | %FM      |
|             | <i>g</i>                   | <i>kg</i> | <i>kg</i> | <i>%</i> | <i>kg</i>                              | <i>kg</i> | <i>kg</i> | <i>%</i> | <i>l</i>                                  | <i>kg</i>        | <i>kg</i> | <i>kg</i> | <i>%</i> |
| NPS1        | 52.1                       | 21.6      | 3.12      | 12.6     | 1.558                                  | 19.1      | 5.75      | 32.2     | 22.773                                    | 12.74            | 19.72     | 5.04      | 20.3     |
| NPS2        | 74.8                       | 30.6      | 10.21     | 24.9     | 1.98                                   | 31.59     | 9.33      | 22.8     | 38.573                                    | 20.02            | 29.72     | 11.05     | 27.1     |

FFM: Fat Free Mass, FM: Fat Mass, BMC: Bone Mineral Content, TBW: Total Body Water

#### c Total body water

| <i>Unit</i> | TBW-2H     | TBW-18O    | Turnover rate kH | Turnover rate kO | lean body mass | body fat  | body fat | VCO <sub>2</sub> |
|-------------|------------|------------|------------------|------------------|----------------|-----------|----------|------------------|
|             | <i>%WT</i> | <i>%WT</i> | <i>d-1</i>       | <i>d-1</i>       | <i>kg</i>      | <i>kg</i> | <i>%</i> | <i>mol/d</i>     |
| NPS1        | 53.8       | 51.9       | -0.12            | -0.16            | 17.27          | 7.53      | 30.4     | 10.7             |
| NPS2        | 50.92      | 49.32      | -0.1             | -0.13            | 27.7           | 13.3      | 32.44    | 13.55            |

#### d Energy expenditure by doubly labeled water method

| <i>Unit</i> | <i>kcal/kg BW</i> | <i>kcal/kg FFM</i> | <i>BMR (kcal/d)</i> | <i>PAL (TEE/BMR)</i> |
|-------------|-------------------|--------------------|---------------------|----------------------|
| NPS1        | 54.8              | 68.9               | 942                 | 1.44                 |
| NPS2        | 42                | 57.9               | 1212                | 1.42                 |

PAL: Physical Activity Level, TEE: Total Energy Expenditure, BMR: Basal Metabolic Rate

**e Energy expenditure by indirect calorimetry**

|      | BMR measured | Predicted BMR by height/weight (Schofield) | Measured BMR vs predicted (Schofield) |      | Predicted BMR by weight only (Schofield) | Measured BMR vs predicted (Schofield) |      | PAL (TEE/BMR) |
|------|--------------|--------------------------------------------|---------------------------------------|------|------------------------------------------|---------------------------------------|------|---------------|
| Unit | kcal/d       | kcal/d                                     | kcal/d                                |      | kcal/d                                   | kcal/d                                |      |               |
| NPS1 | 942          | 884                                        | 57                                    | 6.5% | 854                                      | 88                                    | 9.3% | 1.16          |
| NPS2 | 1212         | 1159                                       | 53                                    | 4.6% | 1094                                     | 118                                   | 9.7% | 1.45          |

TEE: Total Energy Expenditure, BMR: Basal Metabolic Rate, PAL: Physical Activity Level

**f**

|      | 24 hr EE | 24 hr EE | 24 hr RQ | 24 hr HR | 24 hr activity | Sleep EE | Sleep EE | Sleep RQ | Sleep HR | Sleep activity | BMR      | BMR     | BMR RQ | BMR HR | BMR activity |
|------|----------|----------|----------|----------|----------------|----------|----------|----------|----------|----------------|----------|---------|--------|--------|--------------|
| Unit | kcal/min | kcal/kg  |          | BPM      | CPM            | kcal/min | kcal/kg  |          | BPM      | CPM            | kcal/min | kcal/kg |        | BPM    | CPM          |
| NPS1 | 0.76     | 46.9     | 0.85     | 101      | 66             | 0.56     | 32.3     | 0.88     | 86       | 86             | 0.65     | 38      | 0.8    | 89     | 1            |
| NPS2 | 1.22     | 42.9     | 0.87     | 105      | 102            | 0.91     | 31.9     | 0.82     | 99       | 99             | 0.84     | 29.6    | 0.74   | 96     | 17           |

EE: Energy Expenditure, RQ: Respiratory Quotient, CPM: Counts per Minute, BMR: Basal Metabolic Rate

**g**

|      | Walk 2.5 mph | Walk 3 mph | Free Time |
|------|--------------|--------------|--------------|--------------|--------------|------------|------------|------------|------------|------------|-----------|-----------|-----------|-----------|-----------|
|      |              |              | RQ           | HR           | activity     |            |            | RQ         | HR         | activity   |           |           | RQ        | HR        | activity  |
| Unit | kcal/min     | kcal/kg      |              | BPM          | CPM          | kcal/min   | kcal/kg    |            | BPM        | CPM        | kcal/min  | kcal/kg   |           | BPM       | CPM       |
| NPS1 | N/A          | N/A          | N/A          | N/A          | N/A          | N/A        | N/A        | N/A        | N/A        | N/A        | 0.86      | 50.1      | 0.83      | 112       | 111       |
| NPS2 | 3.63         | 127.4        | 0.92         | 144          | 1168         | 4.39       | 154.3      | 0.95       | 167        | 1270       | 1.29      | 45.4      | 0.89      | 108       | 120       |

EE: Energy Expenditure, RQ: Respiratory Quotient, CPM: Counts per Minute, BMR: Basal Metabolic Rate

**Supplemental Table 1** Anthropometric measurements, body composition and energy expenditure of two individuals with NPS

(a) Anthropometric measurements: Body weight, height, and computed BMI.\*<sup>30</sup>; †Normal values calculated for sedentary and active females age 24 and 18 years, respectively, according to<sup>14</sup>. (b) Body composition obtained using the total body potassium (TBK) method, dual-energy X-ray absorptiometry (DXA), and BioPod air displacement plethysmography and computed body composition

using the Lohman-4C model. (c) Total body obtained using the doubly-labeled water method and derived parameters. (d) Energy expenditure as derived from TBW measurements. (e) Energy expenditure by indirect calorimetry. (f) Energy expenditure during 24 hr and sleep phase by indirect calorimetry. (g) Energy expenditure during walking at various paces and unallocated free time by indirect calorimetry.

**Supplemental Table 2**

**a Vitals**

| Unit            | BP            |        |        | HR     |     |     | Respirations | Temp      |
|-----------------|---------------|--------|--------|--------|-----|-----|--------------|-----------|
|                 | mm Hg         | mm Hg  | mm Hg  | BPM    | BPM | BPM | RPM          | °F        |
| NPS1            | 132/73        | 145/74 | 128/79 | 94     | 97  | 97  | 18           | 98.7      |
| NPS2            | 142/95        | 139/97 | 129/82 | 98     | 103 |     | 20           | 97.6      |
| reference value | 133±20/79±11* |        |        | 68±11* |     |     | 12-20        | 97.6-99.6 |

**b Hormones**

| Unit            | Leptin<br>ng/ml | Ghrelin<br>pg/ml | Adiponectin<br>µg/ml |
|-----------------|-----------------|------------------|----------------------|
| NPS1            | 5.7             | 891              | 8.1                  |
| NPS2            | 11.1            | 522              | 8.5                  |
| reference value | 8.0 – 38.9      | 520 - 700        | 5 – 37               |

**Supplemental Table 2** Vitals and select hormone concentrations of two individuals with NPS

(a) Blood pressure (measured in triplicate), heart rate (measured in triplicate/duplicate), respirations, and body temperature of two individuals with NPS. \* Reference values from<sup>31</sup>. (b) Plasma Leptin, Ghrelin, and Adiponectin in two individuals with NPS.

### **Additional References**

32. National Center for Health Statistics. Anthropometric Reference Data for Children and Adults: United States, 2011–2014. 1–46 (2016).
33. Herbert, A., Cruickshank, J. K., Laurent, S., Boutouyrie, P. Reference Values for Arterial Measurements Collaboration. Establishing reference values for central blood pressure and its amplification in a general healthy population and according to cardiovascular risk factors. *Eur. Heart J.* **35**, 3122–3133 (2014).
